# Supplementary material
Source: publisher figshare collection journal article supplement (https://gsapubs.figshare.com/ndownloader/files/23319956)
Supplement: Supplementary file 1 [file 23319956]

Walker, A.E., Moore, J.N., Grams, P.E., Dean, D.J., and Schmidt, J.C., 2020, Channel narrowing by inset floodplain formation of the lower Green River in the Canyonlands region, Utah: GSA Bulletin, <https://doi.org/10.1130/B35233.1>.

## Data Repository

### DR1-DR10: Aerial Photographs in the Vicinity of the Hardscrabble Trench

Each year of analyzed aerial photography, including an additional set collected in July 2016, are shown here at an approximately 1:4500 scale. The purple square in DR1-DR9 are approximate boundaries of where the trench was excavated into the floodplain of Hardscrabble Bottom. Cleared vegetation prior to the excavation of the trench can be seen in the 2016 photo. The lines in each image show the banks of the river in different years, labels for each image specifying what years are shown below the image.

**Photo DR1.** 1940-08-30, National Archives and Records Administration

**Photo DR2.** 1951-09-19, United States Geological Survey

**Photo DR3.** 1966, Bureau of Land Management

**Photo DR4.** 1976-08-31, National Park Service

**Photo DR5.** 1988-08-27, Bureau of Reclamation

**Photo DR6.** 1993-06-14, United States Geological Survey

**Photo DR7.** 2002-06-18, 2002-06-19, National Park Service

**Photo DR8.** 2009-08-07, United States Department of Agriculture-Aerial Photography Field Office

**Photo DR9.** 2014-09-11, United States Department of Agriculture-Aerial Photography Field Office

**Photo DR10.** 2016-07-07, United States Department of Agriculture-Aerial Photography Field Office

**Figure DR11.** Grain-size distribution of sediments collected in the lower Green River. The suspended and bed sediments are from physical samples collected from cross-sections at Mineral Bottom to calibrate acoustic suspended sediment monitoring. Suspended sediment samples are depth-integrated EWI samples. In-channel bar sediments were collected from the surface of exposed in-channel bars near Fort Bottom and the trench. The remaining samples were collected from the trench and represent depositional components identified in the trench. Trench samples were collected at points in the trench and show the specific grain size of units; because of that, they are finer than the general sedimentology identified in the trench. The floodplain depositional component is split into levee and trough to illustrate differences in grain size between the two distinct parts of the floodplain. Full facies descriptions are available in Walker (2017).

**Figure DR12.** Channel width for each 1 km reach in the lower Green River, plotted as a function of distance downstream. Large changes in width within a small number of reaches can influence changes for the entire study area.

**Figure DR13.** Rating relations for the Mineral Bottom gage (black line) and at the Hardscrabble trench (white circles). The similar curves show that stage at Hardscrabble Bottom can be estimated using discharge values from the Mineral Bottom gage. Stage at both gages has been normalized to a common elevation.

**Photo DR1: 1940-08-30, National Archives and Records Administration**

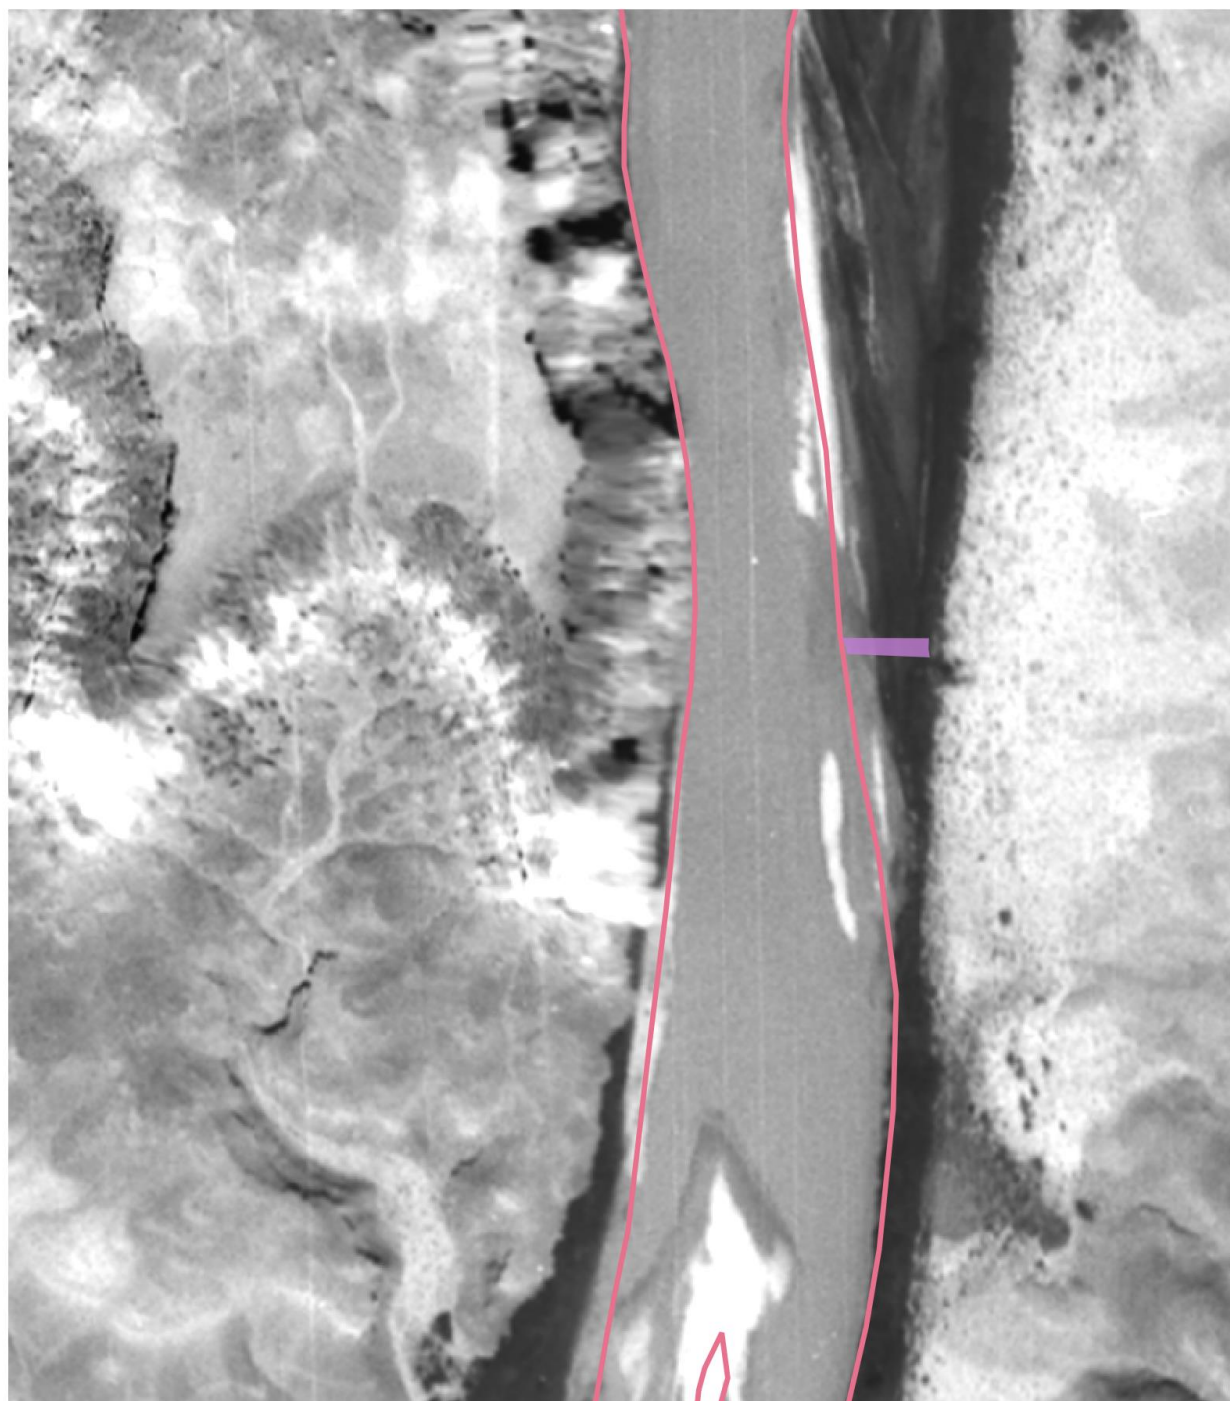

■ Trench Location  
— 2014 bank lines

0 75 150 m

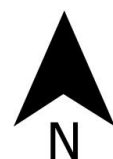

**Photo DR2: 1951-09-19, United States Geological Survey**

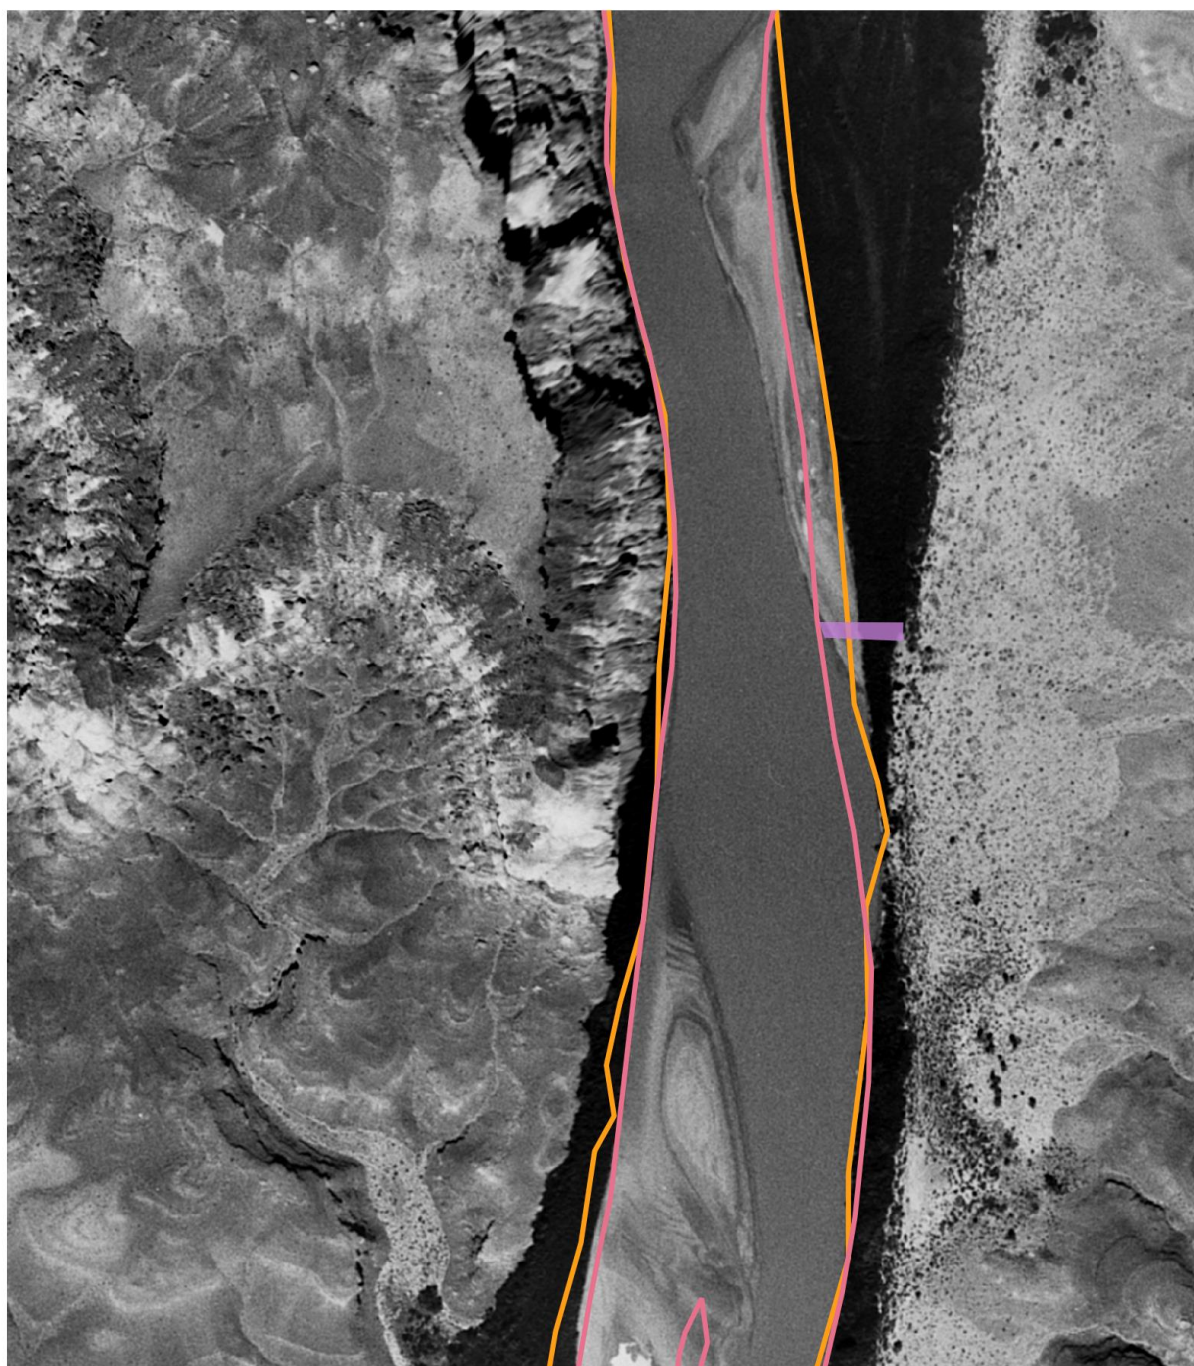

■ Trench Location  
— 2014 bank lines  
— 1940 bank lines

0 75 150 m  
|-----|-----|

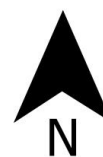



**Photo DR3: 1966, Bureau of Land Management**

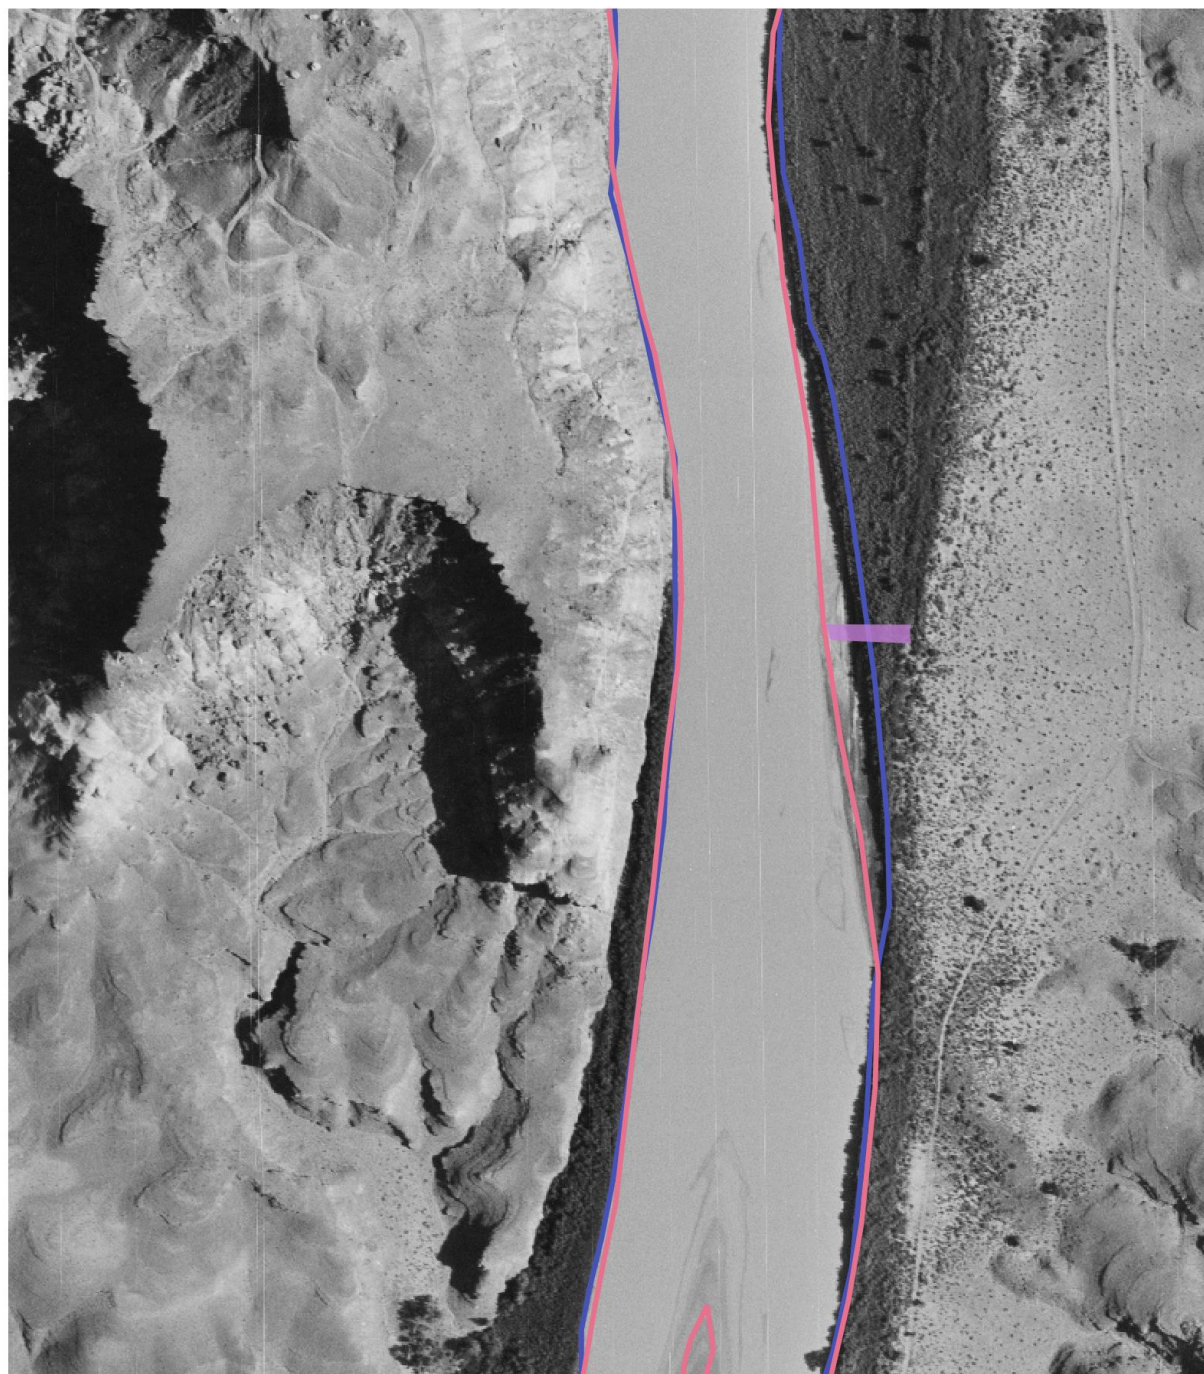

■ Trench Location  
— 2014 bank lines  
— 1951 bank lines

0 75 150 m  
|-----|-----|

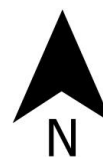

**Photo DR4: 1976-08-31, National Park Service**

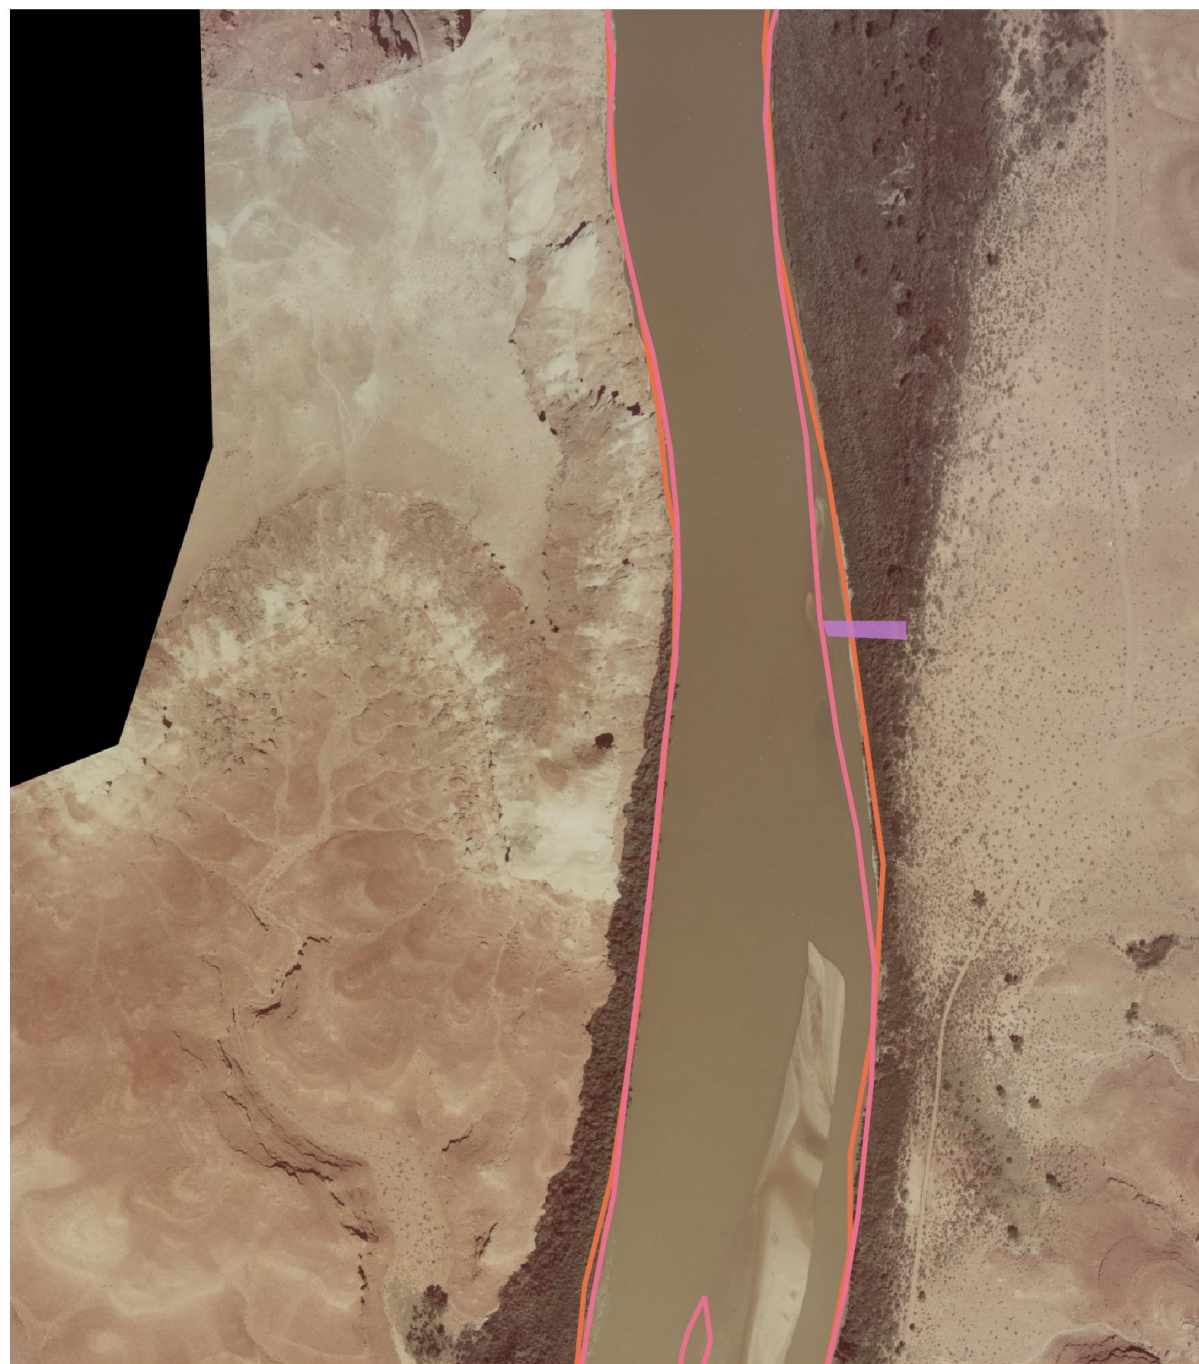

■ Trench Location  
— 2014 bank lines  
— 1966 bank lines

0 75 150 m  
|-----|-----|

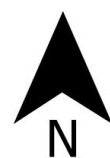



**Photo DR5: 1988-08-27, Bureau of Reclamation**

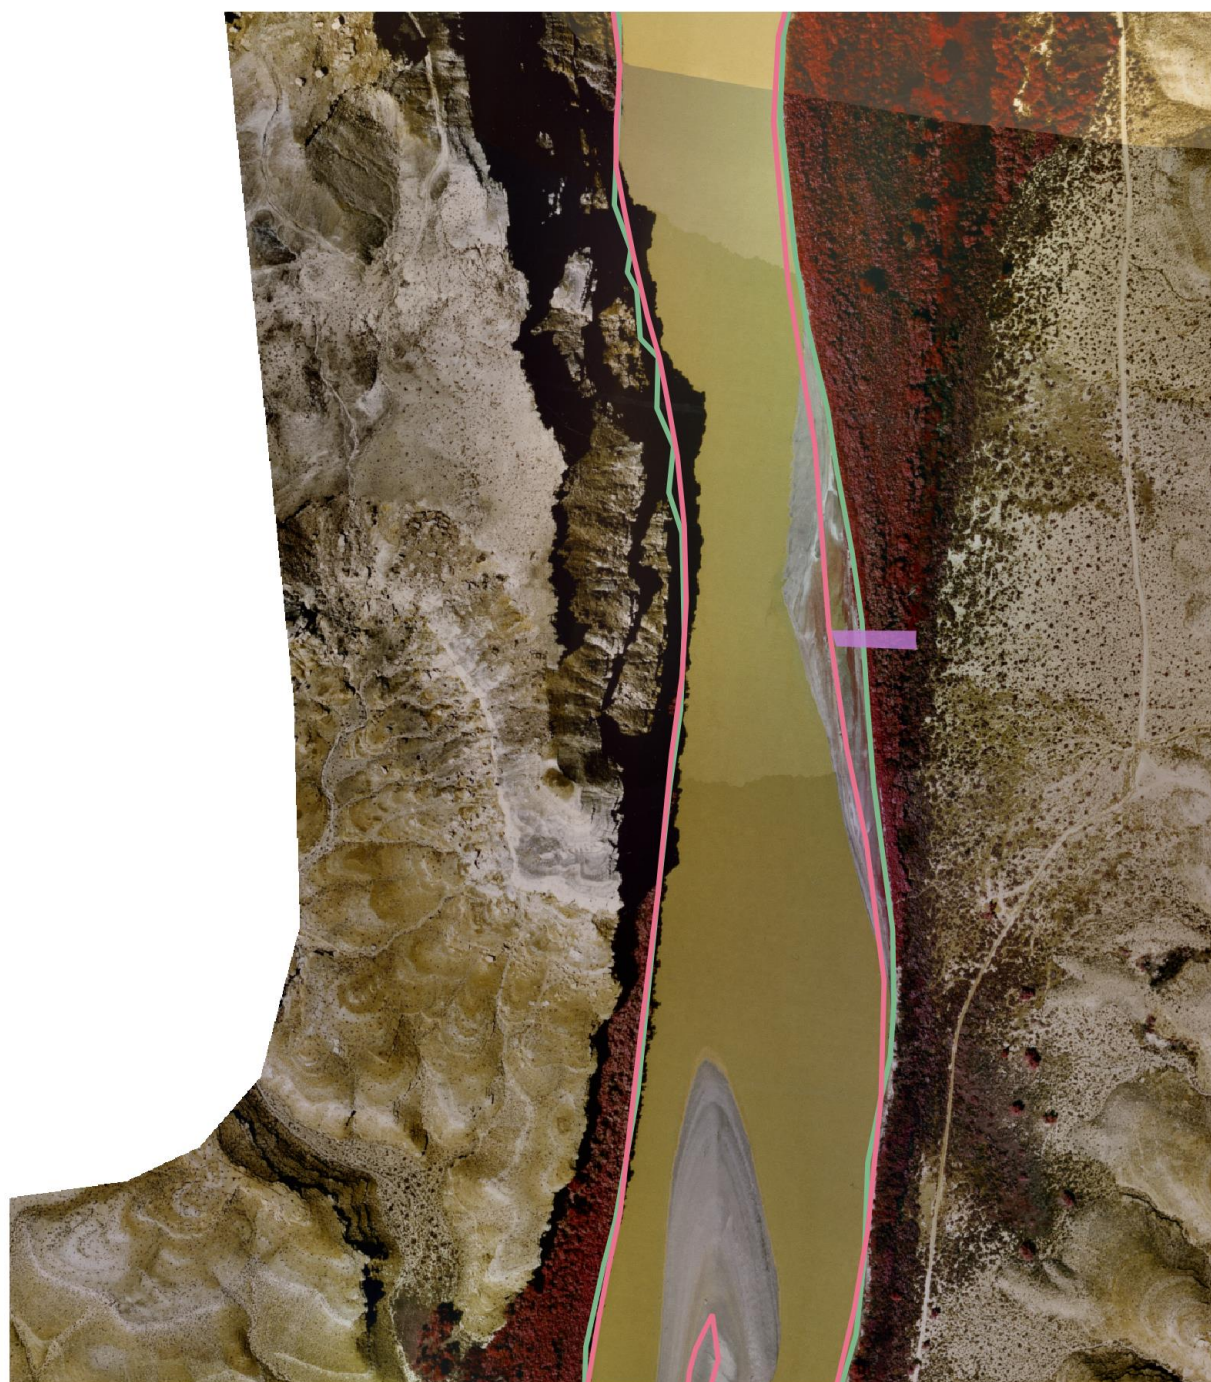

■ Trench Location  
— 2014 bank lines  
— 1976 bank lines

0 75 150 m  
|-----|-----|

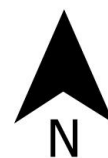



**Photo DR6: 1993-06-14, United States Geological Survey**

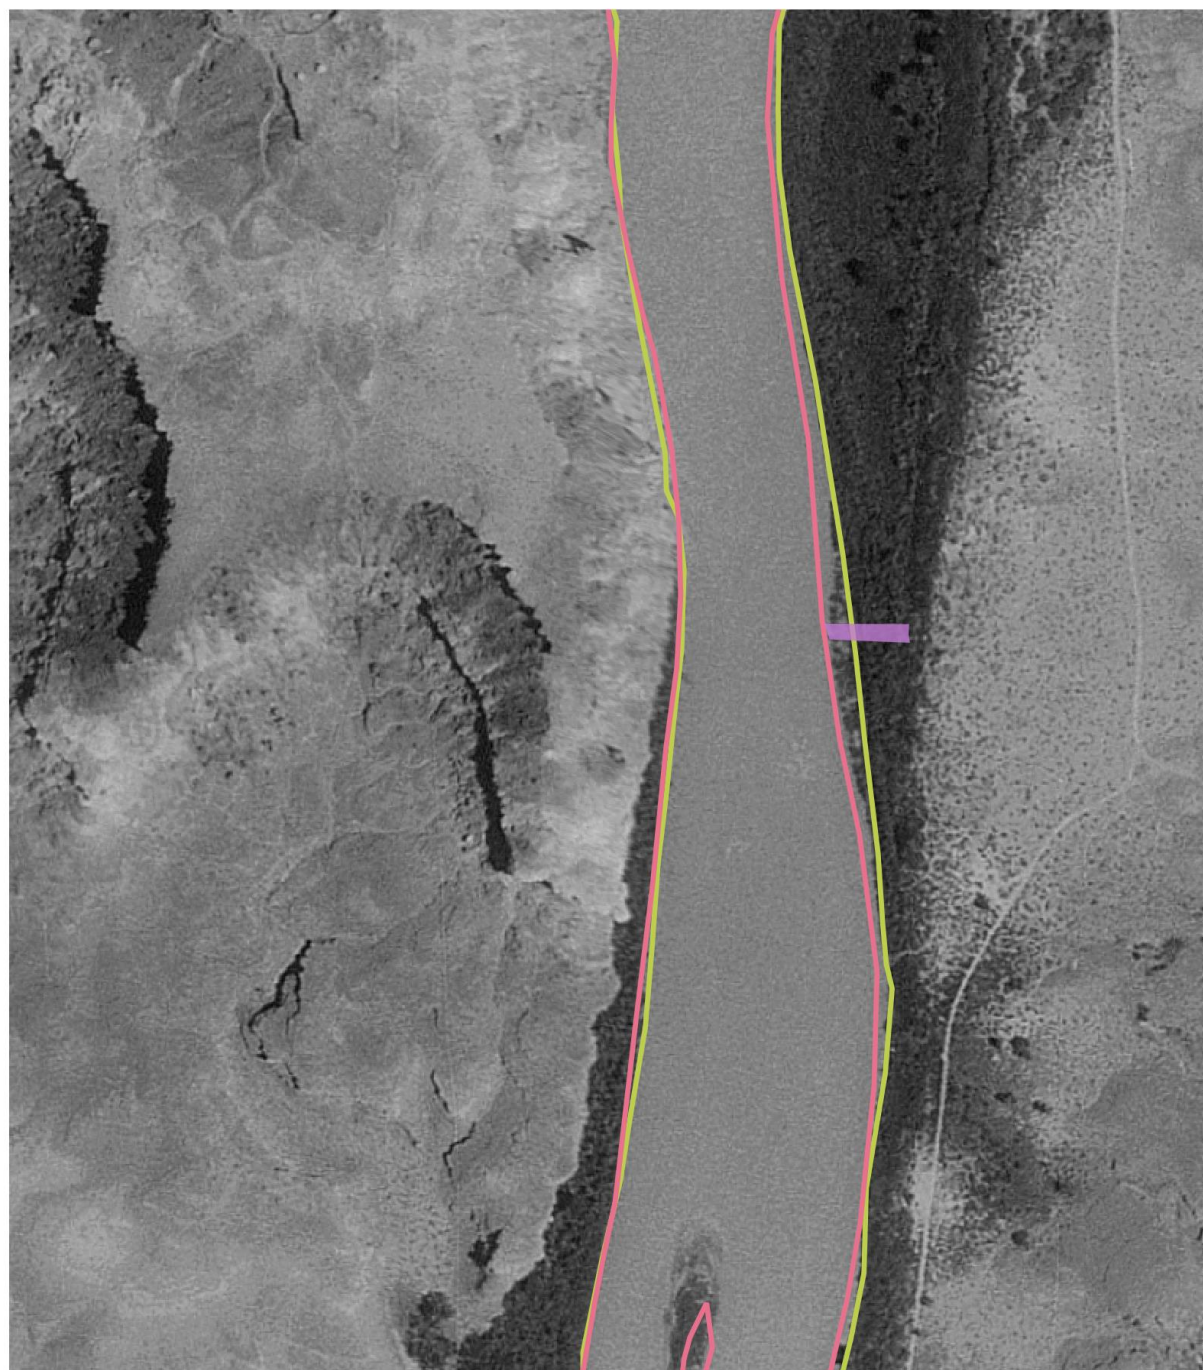

- Trench Location
- 2014 bank lines
- 1988 bank lines

0 75 150 m

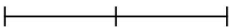A horizontal scale bar with three segments. The first segment is labeled '0', the second '75', and the third '150 m'. The segments are separated by vertical tick marks.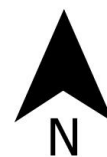



**Photo DR7: 2002-06-18, 2002-06-19, National Park Service**

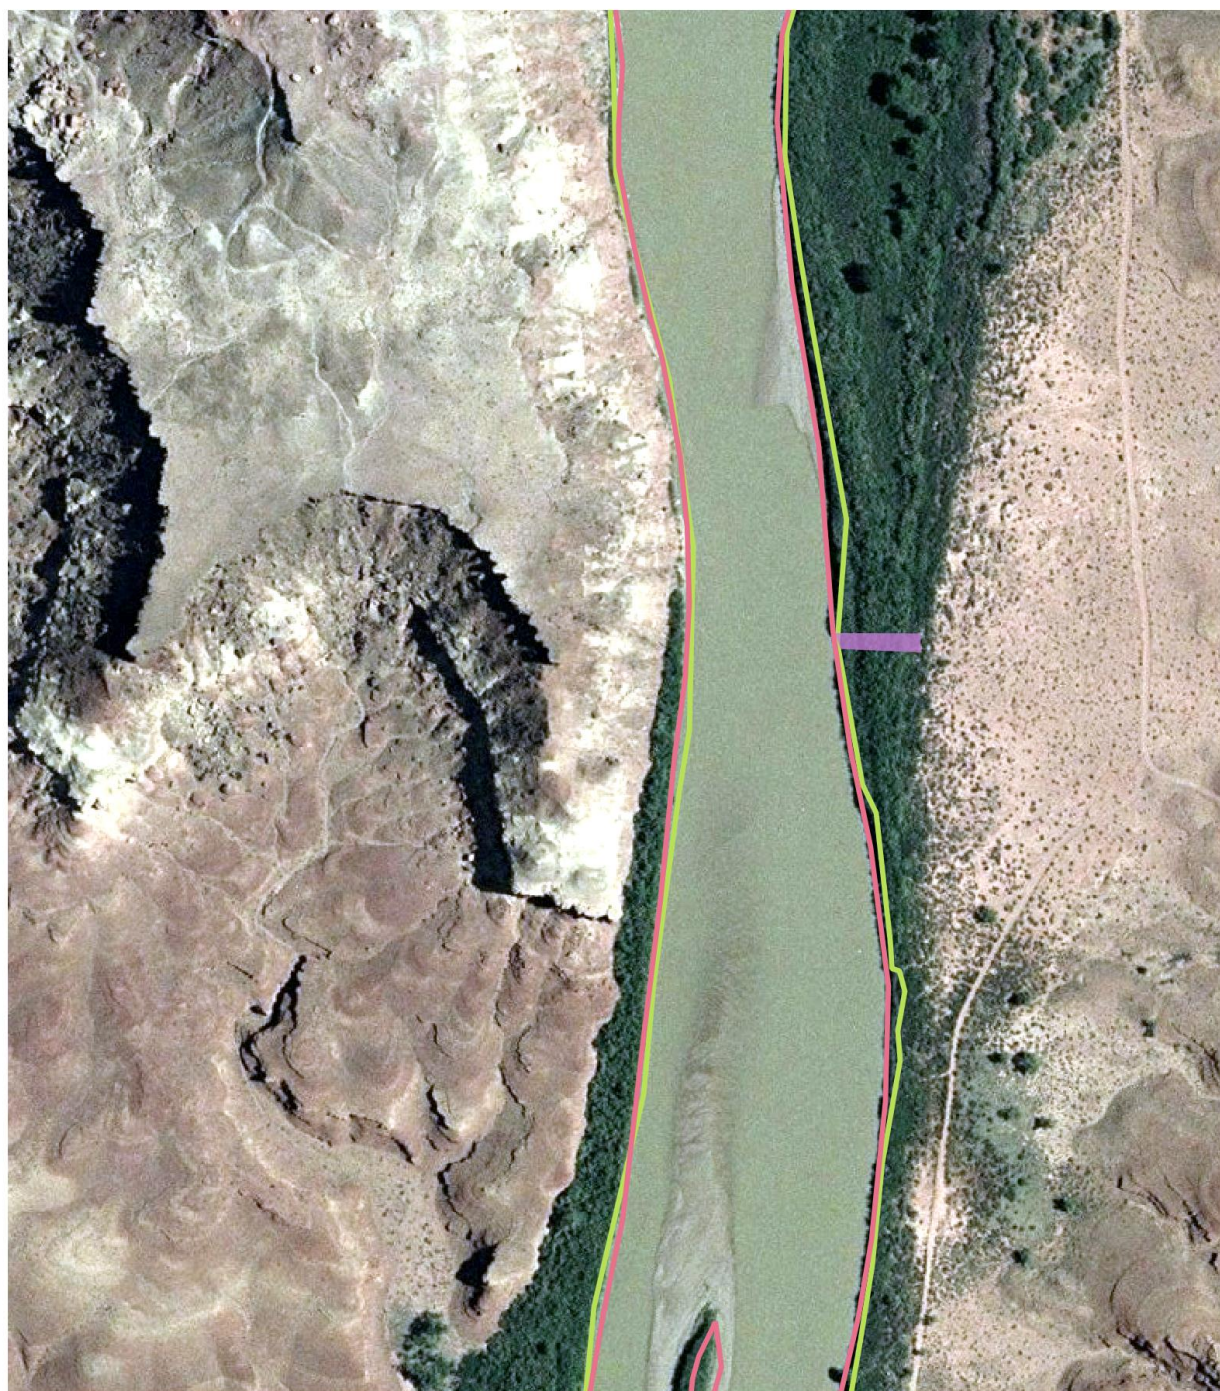

■ Trench Location  
— 2014 bank lines  
— 1993 bank lines

0 75 150 m  
|-----|-----|

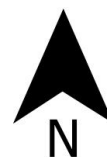



**Photo DR8: Photo S8: 2009-08-07, United States Department of Agriculture-Aerial Photography Field Office**

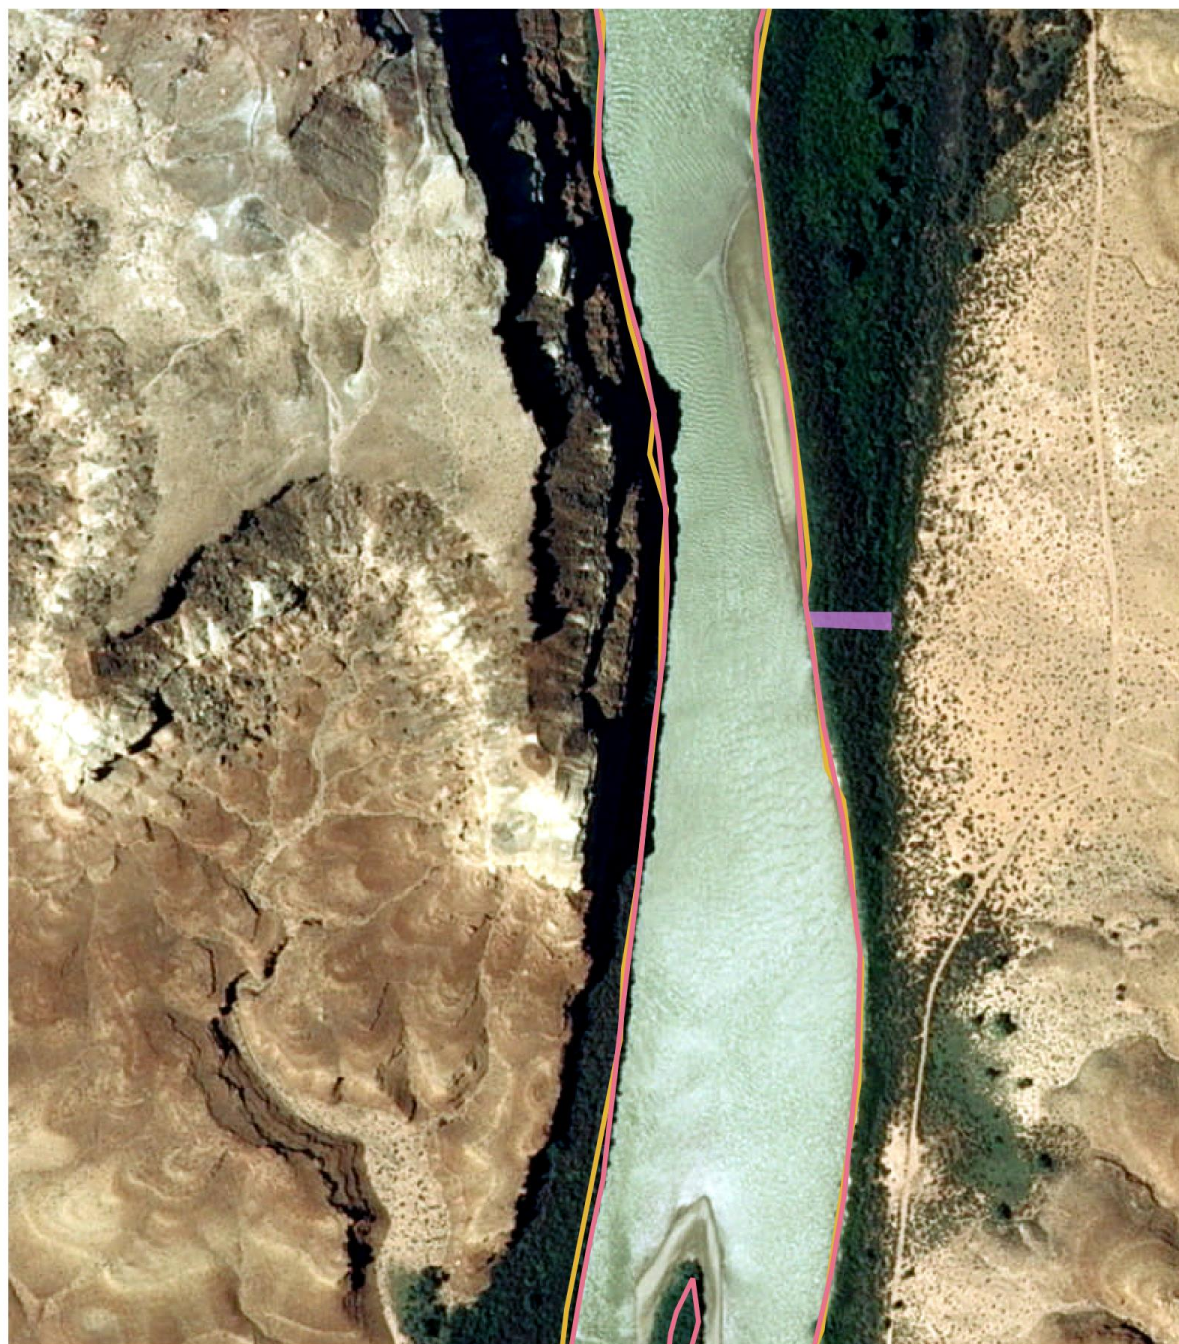

■ Trench Location  
— 2014 bank lines  
— 2002 bank lines

0 75 150 m  
|-----|

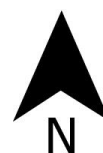



**Photo DR9: 2014-09-11, United States Department of Agriculture-Aerial  
Photography Field Office**

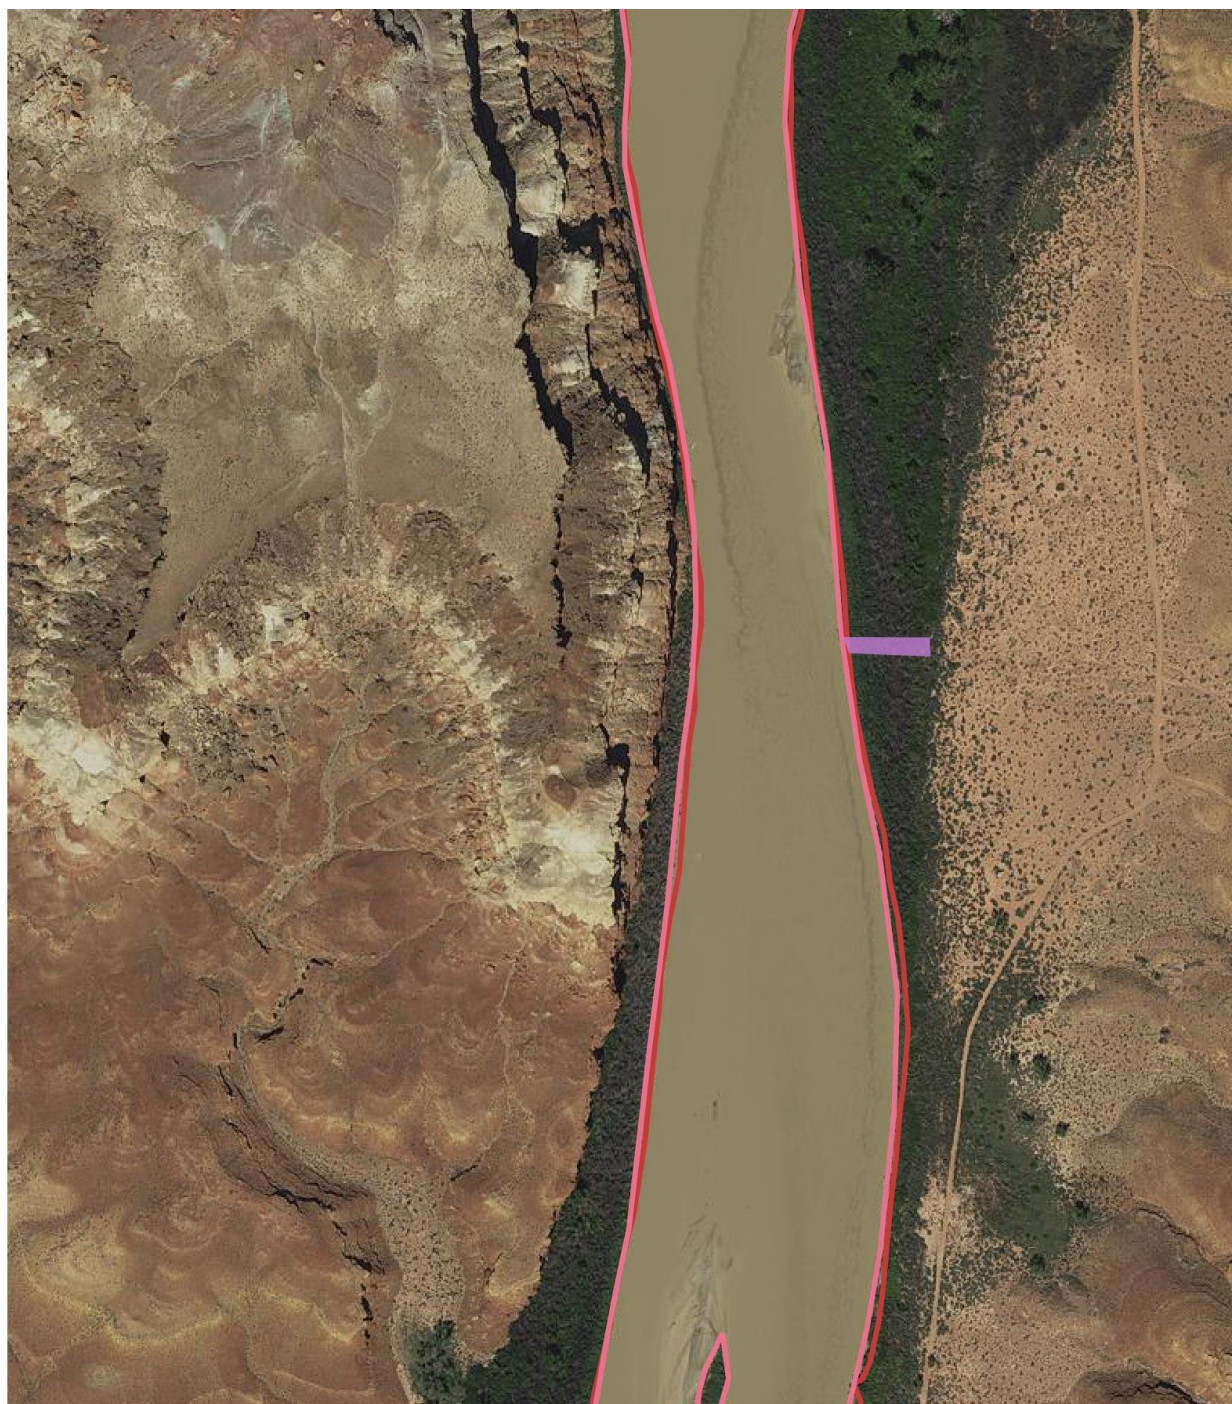

-  Trench Location
-  2014 bank lines
-  2009 bank lines

0 75 150 m

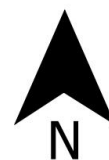



**Photo DR10: 2016-07-07, United States Department of Agriculture-Aerial  
Photography Field Office**

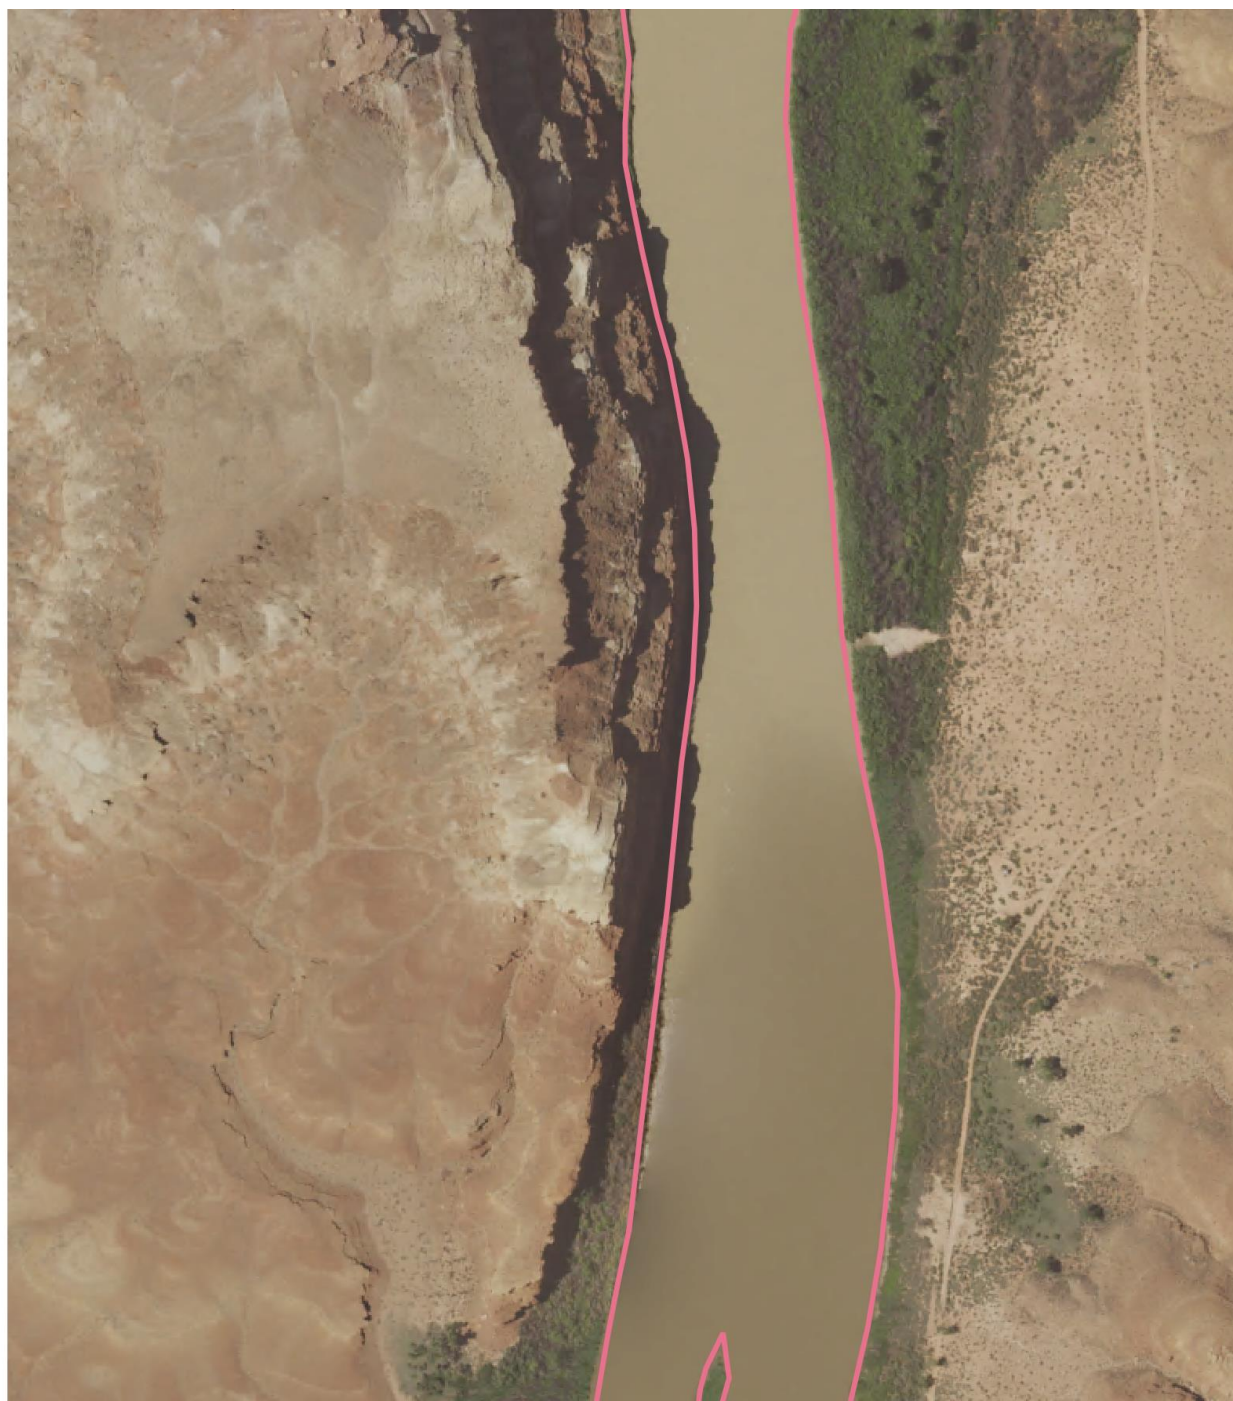

■ Trench Location    0    75    150 m  
— 2014 bank lines    |-----|

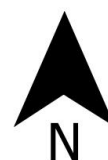

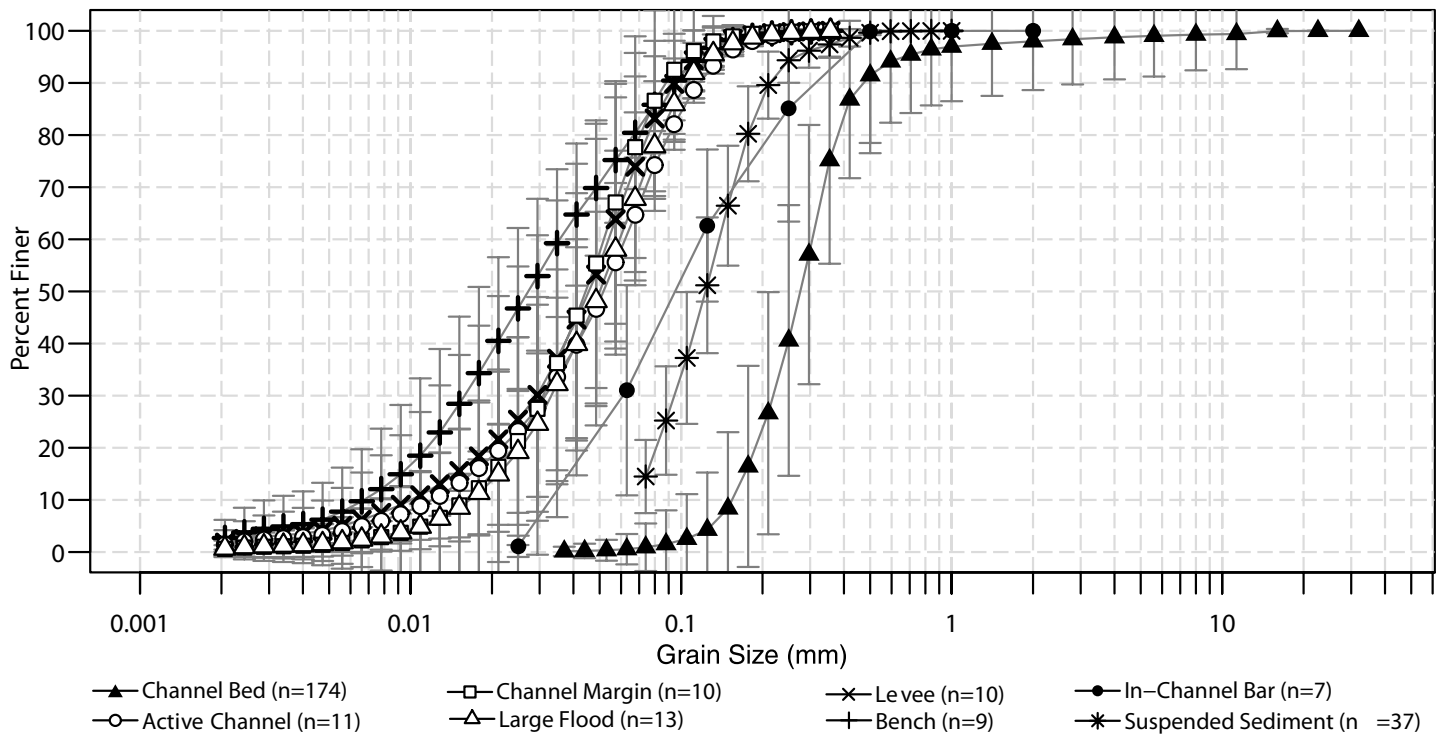

Figure DR11: Grain-size distribution of sediments collected in the lower Green River. The suspended and bed sediments are from physical samples collected from cross-sections at Mineral Bottom to calibrate acoustic suspended sediment monitoring. Suspended sediment samples are depth-integrated EWI samples. In-channel bar sediments were collected from the surface of exposed in-channel bars near Fort Bottom and the trench. The remaining samples were collected from the trench and represent depositional components identified in the trench. Trench samples were collected at points in the trench and show the specific grain size of units; because of that, they are finer than the general sedimentology identified in the trench. The floodplain depositional component is split into levee and trough to illustrate differences in grain size between the two distinct parts of the floodplain. Full facies descriptions are available in Walker (2017).



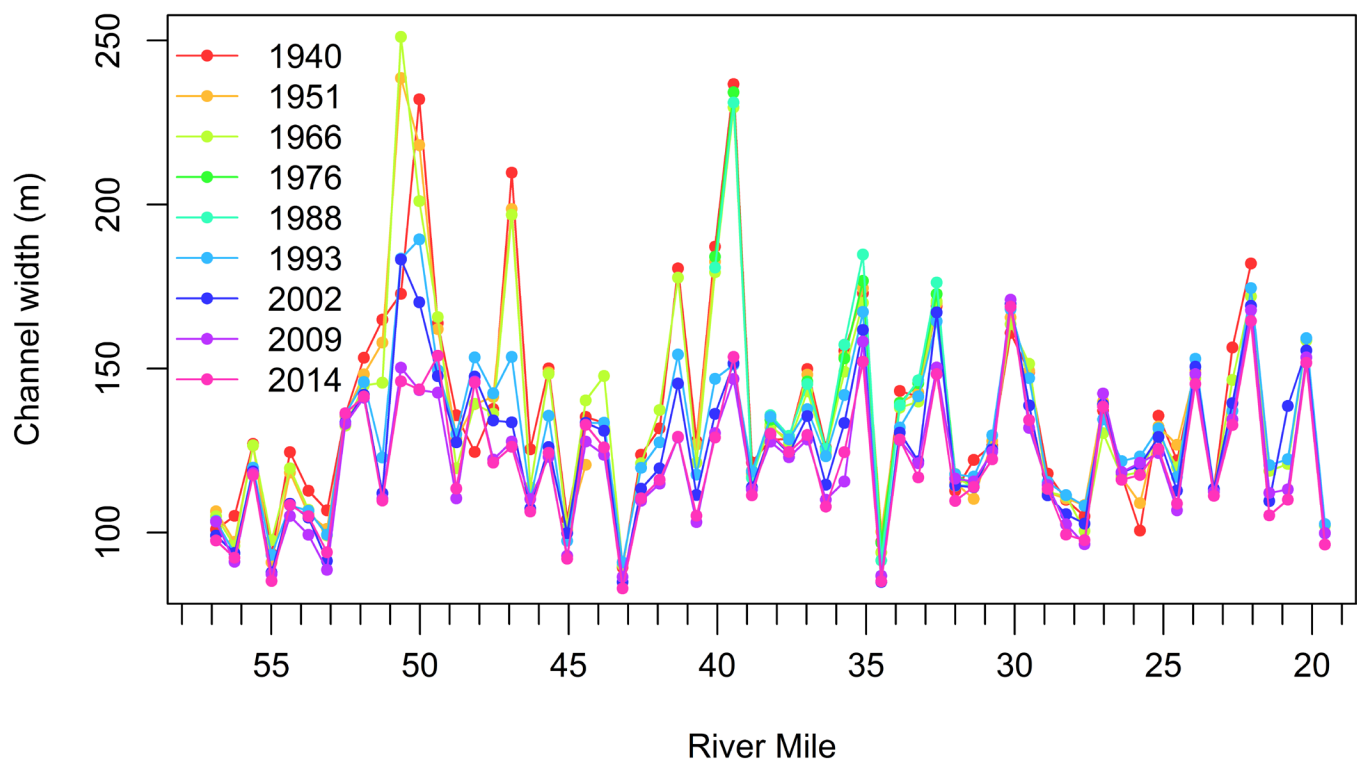

Figure DR12: Channel width for each each 1 km reach in the lower Green River, plotted as a function of distance downstream. Large changes in width within a small number of reaches can influence changes for the entire study area.

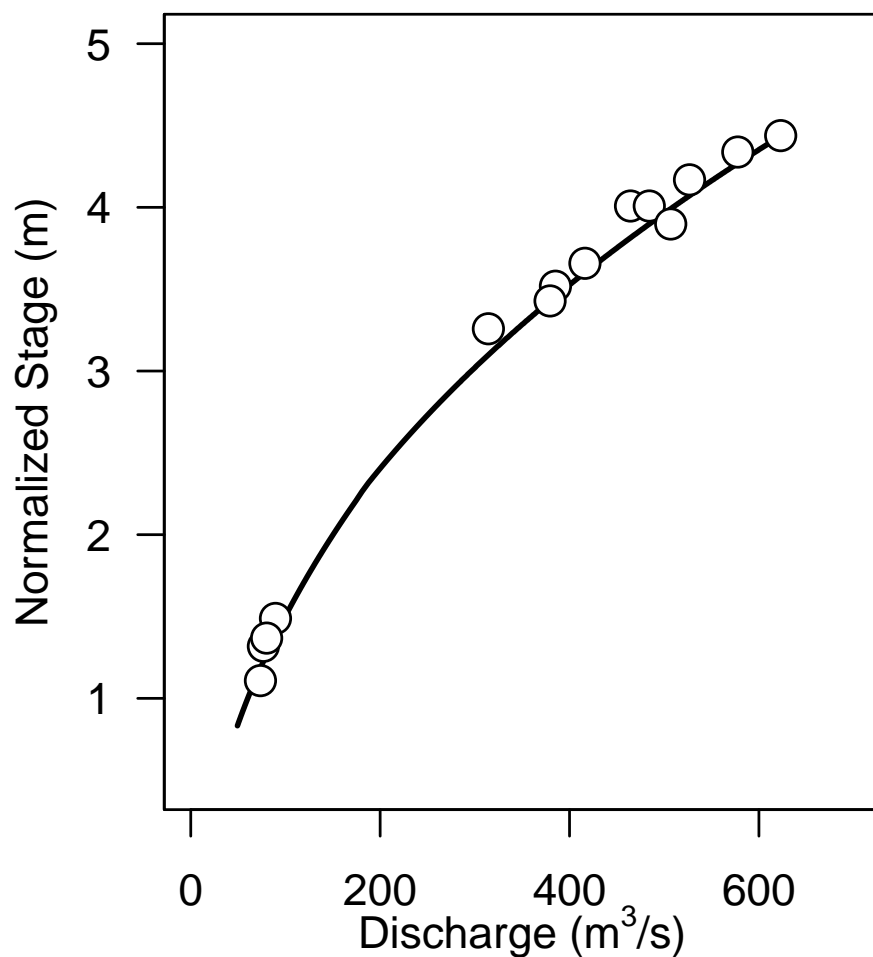

Figure DR13: Rating relations for the Mineral Bottom gage (black line) and at the Hard-scrabble trench (white circles). The similar curves show that stage at Hardscrabble Bottom can be estimated using discharge values from the Mineral Bottom gage. Stage at both gages has been normalized to a common elevation.
